# Supplementary material for: Police Violence in Health Care Settings in US Media Coverage
Source: PubMed Central journal article supplement (PMC10644214; doi:10.1001/jamanetworkopen.2023.42998), 2023-11-13
Supplement: jamanetwopen-e2342998-s001.pdf [file jamanetwopen-e2342998-s001.pdf]

## Data Sharing Statement

Saadi. Police Violence in Healthcare Settings in US Media Coverage. *JAMA Netw Open*.  
Published November 13, 2023. doi:10.1001/jamanetworkopen.2023.42998

### Data

**Data available:** No

### Additional Information

**Explanation for why data not available:** All data is already made available in the manuscript.
